# 1 PA-X is an avian virulence factor in 2 H9N2 avian influenza virus

3 Running title: PA-X and H9N2

4 Anabel L. Clements<sup>a,b</sup>, Thomas P. Peacock<sup>a,c</sup>, Joshua E. Sealy<sup>a</sup>, Saira Hussain<sup>b,\*</sup>, Jean-Remy Sadeyen<sup>a</sup>,  
5 Holly Shelton<sup>a</sup>, Paul Digard<sup>b</sup>, and Munir Iqbal<sup>a#</sup>

6 <sup>a</sup>The Pirbright Institute, Pirbright, Woking, UK, GU24 0NF.

7 <sup>b</sup>The Roslin Institute and Royal (Dick) School of Veterinary Studies, University of Edinburgh, Edinburgh,  
8 UK, EH25 9RG

9 <sup>c</sup>Department of Infectious Diseases, Imperial College London, UK, W2 1PG

10 \*Current address: The Francis Crick Institute, London, UK, NW1 1AT

11 #Corresponding author: Munir Iqbal, [munir.iqbal@pirbright.ac.uk](mailto:munir.iqbal@pirbright.ac.uk)

12 Abstract word count: 156

13 Main body word count: 5328

14

15

16

17

18

19

20

## 21 Abstract

22           Influenza A viruses encode several accessory proteins that have host- and strain-specific effects  
23 on virulence and replication. The accessory protein PA-X is expressed due to a ribosomal frameshift  
24 during translation of the PA gene. Depending on the particular combination of virus strain and host  
25 species, PA-X has been described as either acting to either reduce or increase virulence and/or virus  
26 replication. In this study, we set out to investigate the role PA-X plays in H9N2 avian influenza viruses,  
27 focussing particularly on the natural avian host, chickens. We found H9N2 PA-X induced robust host  
28 shutoff in both mammalian and avian cells and increased replication in mammalian, but not avian cells.  
29 We further showed that PA-X affected embryonic lethality *in ovo* and led to more rapid viral shedding  
30 and widespread organ dissemination *in vivo* in chickens. Overall, we conclude PA-X may act as a  
31 virulence factor for H9N2 viruses in chickens, allowing faster replication and wider organ tropism.

## 32 Introduction

33           Influenza A viruses (IAV) have segmented negative-sense RNA genomes encoding 10 core  
34 proteins and a variable number of strain-specific accessory proteins (Vasin et al., 2014). Due to its small  
35 genome size and nuclear replication, IAV has evolved a number of ways to increase its protein coding  
36 capacity including the use of splice variants (M2, NEP and the more recently discovered M42, PB2-S1  
37 and NS3 proteins), encoding multiple open reading frames (ORFs), both nested and overlapping on a  
38 single gene segment (e.g. PB1-F2, PB1-N40, NA43) and ribosomal frameshifts leading to multi-ORF  
39 fusion proteins (PA-X) (Wise et al., 2012, Wise et al., 2009, Yamayoshi et al., 2016, Selman et al., 2012,  
40 Chen et al., 2001, Machkovech et al., 2019)

41           Influenza A virus segment 3 primarily encodes the polymerase acidic protein (PA). PA is an  
42 integral part of the influenza virus RNA-dependent RNA polymerase (RdRp) and contains two functional  
43 domains, an N-terminal endonuclease (endo) domain, responsible for cleaving host capped RNAs used  
44 to prime viral transcription, and a C-terminal domain, associated with the core of the RdRp (Te Velthuis  
45 and Fodor, 2016). The PA endo domain contains a conserved ribosomal frameshift site – a rare arginine

46 codon facilitates ribosomal stalling, which is followed (at low level) by ribosomal slippage into a +1 open  
47 reading frame (ORF), facilitated by an upstream UUU codon that allows realignment (Firth et al., 2012,  
48 Jagger et al., 2012). The resulting protein, PA-X, is a fusion between the first 191 amino acids of PA (the  
49 endo domain) and up to 61 amino acids translated from the X-ORF in the +1 reading frame. PA-X has  
50 been shown to mediate degradation of host cell mRNAs and disruption of host mRNA processing,  
51 leading to host cell shutoff and a dampened innate immune response (Jagger et al., 2012, Gaucherand  
52 et al., 2019, Khapersky et al., 2016, Oishi et al., 2015, Lee et al., 2017, Hayashi et al., 2016, Desmet et  
53 al., 2013).

54 H9N2 avian influenza viruses are enzootic through much of Asia, the Middle East and Africa  
55 (Peacock et al., 2019). H9N2 viruses cause massive economic damage due to their impact on poultry  
56 production systems, causing moderate morbidity and mortality, especially in the context of viral or  
57 bacterial coinfection. Additionally, H9N2 viruses pose a direct zoonotic threat to humans and are  
58 considered viruses with pandemic potential (Peacock et al., 2019, Song and Qin, 2020). As well as being  
59 zoonotic threats in their own right, H9N2 viruses have contributed polymerase genes to multiple  
60 zoonotic avian influenza viruses, including epidemic H7N9 (Liu et al., 2013).

61 Several studies have investigated the role of PA-X on virulence and replication of avian influenza  
62 viruses in mammalian and avian hosts. There is little consensus between these studies and there  
63 appears to be virus strain- and host species-specific differences in whether PA-X expression increased or  
64 decreased replication, virulence and transmissibility of IAV (Gao et al., 2015a, Gao et al., 2015b, Gao et  
65 al., 2015c, Jagger et al., 2012, Gong et al., 2017, Hussain et al., 2019, Lee et al., 2017, Sun et al., 2020, Hu  
66 et al., 2015, Rigby et al., 2019, Ma et al., 2019). In H9N2 viruses, expression of full length PA-X has been  
67 shown to be a virulence factor in mammalian infection systems (Gao et al., 2015c, Gao et al., 2015a).  
68 However, it is unclear what role PA-X has in these viruses in their natural chicken hosts.

69 In this study we set out to investigate the role of PA-X in a contemporary G1-lineage H9N2 virus,  
70 typical of viruses circulating in the Middle East and South Asia (Peacock et al., 2019). We found that the  
71 H9N2 virus expressed a PA-X capable of robust host shutoff which correlated with PA-X expression.

72 Removing PA-X expression decreased viral replication in mammalian, but not avian cell culture systems,  
73 although it did reduce embryonic lethality *in ovo*. *In vivo*, in the natural chicken host, ablation of PA-X  
74 expression led to delayed shedding and restricted viral dissemination. Overall, our results suggest PA-X  
75 may be an H9N2 virulence factor in the natural avian host, allowing faster replication and increased  
76 visceral organ tropism.

## 77 Results

### 78 Generation of H9N2 viruses with altered PA-X expression

79 To investigate the role of PA-X in an H9N2 background we generated a panel of mutants in the  
80 background of a contemporary G1-lineage H9N2 virus, A/chicken/Pakistan/UDL-01/2008 (UDL-01),  
81 typical of viruses still circulating in South Asia and the Middle East (Iqbal et al., 2009, Sealy et al., 2018).  
82 Mutants were generated (in cDNA copies of segment 3 cloned into a reverse genetics plasmid) using a  
83 previously validated approach, with the frameshift site mutated in such a way that ribosomal slippage  
84 should be inhibited (FS); additionally, a panel of truncated PA-X mutants with premature termination  
85 codons (PTC) spaced throughout the X-ORF, were made (Table 1, Figure 1A) (Jagger et al., 2012, Hussain  
86 et al., 2019). All mutations were synonymous in the coding sequence of PA.

87 To confirm ablation of PA-X expression and/or validate the truncations, *in vitro*  
88 transcription/translation assays in rabbit reticulocyte lysate were carried out directly from the plasmids.  
89 Comparable levels of PA expression were seen across every construct, confirming the PA-X mutations  
90 did not affect PA expression (Figure 1B, C). As expected (Jagger et al., 2012, Hussain et al., 2019, Lee et  
91 al., 2017), PA-X expression was drastically reduced in the FS mutant (Figure 1B, D). Upon X-ORF  
92 truncation, a ladder effect where the size of PA-X was progressively decreased by the PTC mutations  
93 could be seen, while both PTC1 and PTC2 also showed a reduction of PA-X expression. Overall, these  
94 results indicate that a previously used strategy for altering PA-X expression is also successful in this  
95 H9N2 virus background.

## 96 A PA-X frameshift mutation abrogates host cell shutoff activity

97 PA-X plays a key role in IAV host cell shutoff, therefore the ability of the H9N2 PA-X variants to  
98 repress cellular gene expression was tested using transfected segment 3 plasmids in  $\beta$ -galactosidase ( $\beta$ -  
99 gal) reporter assays. HEK 293Ts or DF-1 cells were transfected with the  $\beta$ -gal plasmid along with  
100 segment 3 plasmids or an empty vector control,  $\beta$ -gal accumulation was measured by enzyme assays 48  
101 hours later and normalised to empty vector. UDL-01 WT PA-X but not the A/Puerto Rico/8/34 (PR8) PA-X  
102 showed robust repression of  $\beta$ -gal expression in both cell types, and introduction of the FS mutant  
103 ablated the UDL-01 activity (Figure 2A, B), indicating that the shutoff activity of segment 3 is dependent  
104 on PA-X expression but varies according to IAV strain, as previously shown (Hussain et al., 2019, Jagger  
105 et al., 2012, Desmet et al., 2013). When shut-off activity of the UDL-01 PTC mutants was tested in 293T  
106 cells, PTC1 and PTC2 showed a minor and non-statistically significant reduction in host shutoff activity  
107 compared to UDL-01 WT while PTC3 and PTC4 had no apparent effect. Thus UDL-01 encodes an active  
108 PA-X polypeptide, whose shutoff function does not strongly depend on the full X-ORF sequence.

109 To investigate whether the effect of the FS mutation on host shutoff activity of UDL-01 segment  
110 3 seen with plasmid-based assays could be recapitulated with infectious virus, mutant viruses were  
111 generated by reverse genetics. MDCK cells were then infected with WT and FS UDL-01 viruses at a high  
112 MOI (5), and pulsed with puromycin for 30 minutes to label nascent polypeptides (Schmidt et al., 2009),  
113 before being lysed. Lysates were then run on SDS-PAGE western blotted for puromycin (Figure 2C). The  
114 region of the blot corresponding to  $\sim$  80- 50 kDa, above where a pair of virally induced protein bands  
115 were seen, was assessed by densitometry to measure host protein synthesis levels within the cell. UDL-  
116 01 WT virus reduced cellular protein synthesis by over 50% compared to uninfected cells while the FS  
117 mutant only caused <20% host shutoff (Figure 2D). These data corroborate the plasmid-based methods  
118 previously used and showed that in the context of infectious virus, UDL-01 expresses a classically active  
119 PA-X protein.

## 120 PA-X expression does not affect H9N2 polymerase activity

121 Influenza PA-X has been suggested to modulate polymerase activity (Hu et al., 2015, Lee et al.,  
122 2017, Gao et al., 2015b, Gong et al., 2017), although these studies did not all agree on whether PA-X  
123 promotes or suppresses polymerase activity; the effect may be strain- as well as cell-type dependent.  
124 Therefore, we investigated the effect of PA-X expression on H9N2 polymerase activity in avian and  
125 mammalian cells. Cells were co-transfected with plasmids encoding the polymerase components and  
126 NP, alongside a viral RNA-like reporter encoding luciferase. In 293Ts, PB2 and PB1 from the mammalian  
127 adapted strain PR8 were used to overcome the restriction of avian IAV polymerase in these cells,  
128 whereas in avian DF-1 cells, the full polymerase from UDL-01 was used. Exchanging WT UDL-01 segment  
129 3 with the different PA-X mutants had no significant effect on polymerase activity in either mammalian  
130 or avian cells (Figure 2E, F). Furthermore, upon western blotting cell lysates, no differences in PA or  
131 tubulin expression were seen, indicating that PA-X expression did not alter PA accumulation (Figure 2G).

## 132 Viruses with abrogated PA-X expression have a minor replicative defect in 133 mammalian but not avian cells

134 Although no difference in polymerase activity was seen between the different PA-X mutants,  
135 multicycle growth curves were performed in mammalian and avian systems to determine whether  
136 differences in PA-X may affect viral replication in a more biologically relevant context. PA-X removal has  
137 been shown to impact viral replication in several previous studies (Lee et al., 2017, Hu et al., 2015, Gao  
138 et al., 2015b, Gao et al., 2015c), though similarly to polymerase activity these studies tend to disagree  
139 about whether PA-X expression enhances or suppresses viral replication and here too, the effect may be  
140 virus strain and host-specific.

141 Initially, plaque size in MDCKs was assessed to determine if any gross replication defects could  
142 be seen in the mutants as plaque phenotype is a proxy for replicative fitness in influenza viruses. A  
143 modest, but significant reduction in plaque diameter was observed within UDL-01 when PA-X was  
144 removed or truncated up to PTC3 (Figure 3A, B). Average plaque diameters decreased from 1.7 mm to  
145 1.2 mm, 1.25 mm, and 1.36 mm respectively.

146 As UDL-01 FS had the largest impact on plaque diameter and host shutoff, this virus was taken  
147 forward to further viral replication kinetics experiments. MDCKs were infected at a low MOI and virus  
148 titres were assessed over a time course. UDL-01 WT and FS showed very similar growth kinetics,  
149 although UDL-01 WT displayed significantly higher titres at 72 hours post-infection compared to UDL-01  
150 FS (Figure 3C). From 48 hours post-infection there was a trend for decreased viral titres with UDL-01 FS  
151 compared to UDL-01 WT, implying in this particular H9N2 strain PA-X expression may slightly enhance  
152 viral replication in MDCK cells.

153 We next performed a similar growth kinetics experiment in avian primary chicken kidney (CK)  
154 cells. In contrast to the results seen within MDCK cells there was no significant difference in viral  
155 replication between UDL-01 WT and FS at any time point, suggesting a host-specific effect (Figure 3D).  
156 To assess this further, replication kinetics were assessed in 10-day-old fertilised hens' eggs. Eggs were  
157 inoculated with 100 pfu of each virus and allantoic fluid was harvested periodically. *In ovo*, UDL-01 WT  
158 and FS viruses did not exhibit any significant differences in viral replication throughout the course of  
159 infection (Figure 3E). Overall, the impact of mutating PA-X on the replication of H9N2 AIVs was variable  
160 and replication differences appeared to be host-dependent with PA-X playing a role on replication in  
161 mammalian, but not avian systems.

## 162 Viruses with abrogated PA-X expression have lower embryonic lethality

163 PA-X expression has previously been shown to alter viral pathogenicity in animal models *e.g.*  
164 (Jagger et al., 2012, Gao et al., 2015b, Gao et al., 2015c, Gong et al., 2017, Hu et al., 2015, Rigby et al.,  
165 2019) as well as *in ovo* (Hussain et al., 2019). Prior to performing an *in vivo* experiment we infected 10-  
166 day-old embryonated hens' eggs with serial dilutions of UDL-01 WT or FS mutants and assessed  
167 embryonic lethality over 84 hours, as previously described (Hussain et al., 2019). When percentage  
168 survival was plotted against viral dilution a clear difference could be seen between UDL-01 WT and FS  
169 (Figure 3F). The inoculum size of UDL-01 WT negatively affected embryo survival in a dose dependant  
170 manner as seen by the ascending trend line, whereas UDL-01 FS survival was not dose-dependent.

171 Overall, these data were suggestive of a difference in a pathogenicity between the WT and PA-X  
172 deficient viruses.

173 Viruses lacking PA-X expression have delayed shedding and reduced visceral  
174 tropism *in vivo*

175 As the effect of PA-X expression has yet to be assessed in H9N2 viruses in their natural host, we  
176 performed an *in vivo* experiment to assess the effect of PA-X on virus replication, transmission, tropism,  
177 pathogenicity and cytokine expression in chickens. Groups of 10 three-week-old White Leghorn (VALO  
178 breed) chickens were inoculated intranasally with  $10^4$  pfu of either UDL-01 WT or FS virus (or sterile  
179 PBS). One day post-inoculation, 8 naïve contact birds were introduced into each directly infected group  
180 to assess viral transmission. Birds were swabbed daily in both buccal and cloacal cavities to determine  
181 viral shedding. Throughout the study period birds were monitored for clinical signs, however only very  
182 minimal signs were seen in any birds (data not shown). Furthermore, in both directly infected and  
183 contact birds, no culturable virus was detected from cloacal swabs. Directly infected birds in both groups  
184 showed robust buccal shedding from days 1-6, peaking at titres of over  $10^4$  pfu/ml (Figure 4A). However,  
185 birds infected with UDL-01 FS showed a delayed buccal shedding profile compared to UDL-01 WT  
186 infected birds, shedding significantly less on days 1-2. By day 3 post-infection, shedding levels were  
187 comparable between groups and by day 6, an increased number of animals infected with UDL-01 FS  
188 shed compared to WT (2/7 for UDL-01 WT vs 4/6 for UDL FS). Within both groups, viral shedding was  
189 cleared by day 7 post-infection. To estimate the total amount of virus shed by each group, the area  
190 under the shedding curves (AUC) were calculated, somewhat comparable values were obtained for both  
191 viruses; 81,674 for WT UDL-01 versus 241,229 for the FS mutant. This suggested that UDL-01 FS infected  
192 birds shed more virus buccally over the course of the experiment than the UDL-01 WT infected birds.

193 All contact birds in both groups became infected and showed buccal shedding from 1 day post-  
194 exposure to the directly infected birds, indicating robust contact transmission of both viruses (Figure  
195 4B). A similar buccal shedding pattern to the directly infected birds was seen in the contact birds; UDL-  
196 01 FS again showed delayed shedding kinetics, with significantly less virus shed on days 1-2 post-



197 exposure and significantly more virus shed by day 5 post-exposure. Within both contact groups viral  
198 shedding was cleared by day 6 post-exposure. When AUC values were calculated for the contact bird  
199 populations, values were comparable; UDL-01 WT AUC was 94,171 whereas the UDL-01 FS AUC was  
200 104,655. Overall, the shedding profiles of the infected birds suggested that expression of PA-X by the  
201 WT virus led to accelerated, but not increased, buccal shedding of virus compared to a virus which  
202 lacked PA-X expression.

203           On day 2 post-inoculation 3 birds from each group – directly infected, contact or mock – were  
204 euthanised and a panel of tissues were taken to assess viral tropism and cytokine profiles. After RNA  
205 extraction, qRT-PCR for the viral M gene was performed to assess viral replication within different  
206 tissues. In tissues isolated from directly infected birds, viral replication was primarily observed within  
207 the upper respiratory tract in both UDL-01 WT and UDL-01 FS infected birds (Figure 4C). There were no  
208 significant differences in M gene copy number within the nasal tissue and trachea. However,  
209 significantly more viral RNA was detected for UDL-01 WT in the lower respiratory tract in the lung.  
210 Within other visceral organs little viral RNA was detected, particularly in tissues collected from UDL-01  
211 FS infected birds. UDL-01 WT RNA could be detected in both the liver and kidneys to significantly higher  
212 levels than UDL-01 FS. Therefore, UDL-01 WT virus showed increased viral dissemination compared to  
213 UDL-01 FS at day 2 post-inoculation. Tissues taken from the contact birds at day 2 of the experiment (i.e.  
214 day 1 post-exposure), again showed robust RNA levels in the upper respiratory tract tissues, the nasal  
215 tissue and trachea (Figure 4D). Viral loads were not significantly different between UDL-01 WT and FS  
216 infected birds in any tissues and very low levels of RNA were detected in non-respiratory tissues.  
217 Overall, these data show that removal of PA-X from UDL-01 led to reduced viral dissemination at day 2  
218 post-infection for directly inoculated birds.

219

220 Cytokine expression in the upper respiratory tract of directly infected birds  
221 correlated with viral titres

222 PA-X is known to alter host responses by downregulating protein synthesis (Jagger et al., 2012).  
223 Within different host species, modulation of PA-X expression has been shown to alter host expression of  
224 cytokines and chemokines; for example an H9N2 AIV unable to express PA-X has been shown to have  
225 decreased expression of *IL-6*, *IL-1 $\beta$* , *CCL3*, *IFN- $\gamma$*  and *TNF- $\alpha$*  within a mouse model compared to a virus  
226 with PA-X expression (Gao et al., 2015c). Therefore, it was assessed whether UDL-01 WT and FS led to  
227 differential cytokine and chemokine responses within the chicken host. The upper respiratory tract  
228 tissues were chosen due to robust and comparable viral replication in directly infected animals (Figure  
229 4C). qRT-PCR for a range of chicken cytokines and markers of the interferon response were assessed.  
230 The host gene, *RPLPO-1*, was used for gene normalisation.

231 Nasal tissue from directly infected birds displayed little differences in immune response (Figure  
232 5A). Some minor differences were seen with expression of *IFN- $\beta$* , *IFN- $\gamma$*  and *IL-18* with UDL-01 WT  
233 infected birds generally expressing higher levels of cytokines. These differences only reached  
234 significance with the expression of *IL-1 $\beta$*  and the innate immune effector gene *Mx*, with UDL-01 WT  
235 infected birds expressing higher levels of these immune markers. Immune responses in the tracheas of  
236 directly infected birds showed a similar trend to those in the nasal tissue (Figure 5B). Few differences in  
237 cytokine expression were seen between UDL-01 WT and UDL-01 FS infected animals. UDL-01 WT  
238 infected animals again tended to have increased expression of *IFN- $\beta$* , *IFN- $\gamma$*  and *IL-1 $\beta$*  although this only  
239 reached significantly different levels with *CXCLi2*. It was worth noting that although UDL-01 WT trended  
240 towards having higher levels of cytokines in the upper respiratory tract, these tissues also had higher  
241 levels of viral RNA, therefore it is difficult to draw conclusions about whether PA-X is having a direct role  
242 on cytokine expression; the trend for reduced cytokines in FS mutants may be a result of reduced viral  
243 RNA in tissues infected with these viruses.

## 244 Discussion

245 In this study we set out to investigate whether PA-X expression is a virulence factor for H9N2  
246 viruses in their natural poultry host. As expected, ablating PA-X expression resulted in loss of host  
247 shutoff activity, showing that, as with other IAV strains, the shutoff activity of H9N2 viruses is partly due  
248 to PA-X expression. We found that PA-X expression resulted in slightly increased replication in  
249 mammalian MDCK cells but had no effect on titres in primary chicken cells or eggs, although virus with  
250 PA-X caused more embryonic lethality *in ovo* at higher input doses. We further found that *in vivo*,  
251 ablating PA-X expression led to a delayed shedding profile and lower visceral organ tropism. These  
252 results, the first study to investigate the impact of PA-X expression in a low pathogenicity avian influenza  
253 virus in its natural host suggest that PA-X expression aids faster virus replication and dissemination *in*  
254 *vivo*, although we saw little evidence for this acting through viral modulation of induced cytokine levels.

255 The finding here that expression of PA-X causes more rapid virus shedding after infection but  
256 that a virus with ablated PA-X expression potentially sheds for longer than WT virus is similar to what  
257 has been seen for H1N1-infected mice (Lee et al., 2017) and H9N2-infected mice (Gao et al., 2015c). The  
258 latter study showed that when mice were infected with a different lineage of H9N2 virus to the one  
259 used here (BJ94 versus G1) that had PA-X ablated, there was decreased virulence associated with  
260 reduced virus titres in mouse lungs. Interestingly, PA-X tells a contrasting story in high pathogenicity  
261 avian influenza viruses and the 1918 H1N1 pandemic virus. Loss of PA-X in 1918 H1N1 and HPAI H5N1  
262 viruses caused increased virulence in mice (Jagger et al., 2012, Gao et al., 2015b, Gao et al., 2015a, Gao  
263 et al., 2015c) and in ducks and chickens (Hu et al., 2015). While Jagger and colleagues did not link the  
264 increased virulence in mice of 1918 H1N1 IAV lacking PA-X to effects on virus replication, Gao and  
265 colleagues showed that increased virulence in mice after loss of H5N1 PA-X was associated with  
266 increased titers of the PA-X null virus in the lungs, brain and blood of infected mice. Similarly, Hu and  
267 colleagues showed that increased virulence in chickens, ducks and mice on loss of H5N1 PA-X correlated  
268 with increased virus titers of the PA-X null virus.

269           The authors of the H9N2 infection study in mice (Gao et al. 2015c) proposed that differences in  
270 effects of PA-X on virulence could be due to the fact that high pathogenicity viruses induce high levels of  
271 cytokine responses but low pathogenicity viruses do not typically induce high levels of cytokines. Since a  
272  $\Delta$ PA-X mutant of a low pathogenicity virus is less effective at host cell shut off, it was more effective at  
273 eliciting an antiviral response resulting in reduced virus replication in their study.

274           Although no difference in pathogenicity in viruses expressing or lacking PA-X was seen in this  
275 study it should not be ruled out there may be a role. UDL-01 WT has shown to be a good model for a  
276 moderately pathogenic H9N2 virus in previous studies, causing clear clinical signs and even limited  
277 mortality (James et al., 2016, Peacock et al., 2017). However these studies used Rhode Island Red breed  
278 chickens, whereas here we used white Leghorn birds which appear to be more resilient to avian  
279 influenza virus infection (Sironi et al., 2008, Matsuu et al., 2016). Therefore, it is possible that the virus  
280 lacking PA-X is less pathogenic than UDL-01 WT, but this was not observed due to the lack of clinical  
281 signs and mortality in the UDL-01 WT infected groups in this system. It is worth noting we have  
282 previously correlated visceral tropism with pathogenicity and clinical signs in UDL-01 (James et al., 2016,  
283 Peacock et al., 2017); in this study UDL-01 WT did show greater visceral tropism than UDL-01 FS,  
284 perhaps suggesting an attenuated pathogenicity when PA-X expression is ablated.

285           Overall, this work suggests PA-X may play a role in H9N2 viruses in birds by allowing more rapid  
286 replication and dissemination throughout the host, potentially leading to higher pathogenicity. This  
287 work will be useful in future surveillance efforts allowing the assessment of newly sequenced viruses as  
288 it suggests viruses expressing a full-length PA-X are likely to have a wider tropism and higher  
289 pathogenicity than those that do not. Furthermore, this work suggests that there may be slightly  
290 different roles for PA-X in mammalian and avian hosts, potentially helping explain the mechanism by  
291 which PA-X works.

## 292 Materials and methods

### 293 Ethics Statement

294 All animal experiments were carried out in strict accordance with the European and United  
295 Kingdom Home Office Regulations and the Animal (Scientific Procedures) Act 1986 Amendment  
296 regulation 2012, under the authority of a United Kingdom Home Office Licence (Project Licence  
297 Numbers: P68D44CF4 X and PPL3002952).

### 298 Cells

299 Madin-Darby canine kidney (MDCK) cells, human embryonic kidney (HEK) 293T cells and chicken  
300 DF-1 cells were maintained in Dulbecco's Modified Eagle Medium (DMEM; Sigma) supplemented with  
301 10% FBS and 100 U/ml Penicillin-Streptomycin (complete DMEM). All cells were maintained at 37°C, 5%  
302 CO<sub>2</sub>.

303 Primary chicken kidney (CK) cells were generated as described elsewhere (Hennion and Hill,  
304 2015). Briefly, kidneys from three-week-old SPF Rhode Island Red birds were mechanically shredded,  
305 washed, trypsinised, and then filtered. Cells were resuspended in CK growth media (EMEM + 0.6% BSA,  
306 10% v/v tryptose phosphate broth, 300 U/ml penicillin/streptomycin), plated and maintained at 37°C,  
307 5% CO<sub>2</sub>.

308

### 309 Viruses

310 All work in this study was performed with the reverse genetics derived H9N2 virus,  
311 chicken/Pakistan/UDL-01/2008 (UDL-01)(Long et al., 2016). UDL-01 virus segments were expressed in  
312 the bi-directional reverse genetics PHW2000 plasmids (Hoffmann et al., 2000). Mutant PA segments  
313 were generated by site directed mutagenesis.

314 Viruses were rescued as described elsewhere (Hoffmann et al., 2000). Briefly, 250ng of each  
315 segment plasmid were co-transfected into 293Ts plated in 6 well plates using lipofectamine 2000. 16h  
316 post-transfection, media was changed to reverse genetics media (DMEM + 2mM glutamine, 100U/ml

317 penicillin, 100U/ml streptomycin, 0.14% BSA, 5µg/ml TPCK-treated trypsin). Following a 48h incubation  
318 at 37°C, 5% CO<sub>2</sub>, supernatants were collected and inoculated into embryonated hens' eggs for  
319 subsequent harvest of virus infected allantoic fluid.

## 320 *In vitro* translation and autoradiography

321 *in vitro* translations to visualise radiolabelled proteins, the TnT® Coupled Reticulocyte Lysate  
322 system (Promega; #L4610) was utilised as per the manufacturers' instructions using 200ng of plasmid  
323 DNA. Reactions were incubated at 37°C for 90 min then denatured in 50µl protein loading buffer and  
324 analysed via SDS-PAGE and autoradiography. X-ray films were developed using a Konica SRX-101A X-  
325 ograph film processor as per the manufacturers' instructions.

## 326 Host cell shutoff assays

327 β-gal shutoff reporter assays were performed as described elsewhere (Jagger et al., 2012).  
328 Briefly, 293T or DF-1 cells were co-transfected with expression plasmids for the influenza segment 3 (PA)  
329 and β-galactosidase (β-gal) reporter. 48 hours later, cells were lysed with 100 µl of 1x Reporter lysis  
330 buffer (Promega). β-gal expression was assayed using the β-galactosidase enzyme assay system  
331 (Promega). A Promega GloMax Multi Detection unit was used to measure absorbance at 420 nm.

332 For the shutoff activity assays using live virus, MDCKs were infected with virus at a high MOI of  
333 5. At 7.5 hours post-infection, cells were washed and the medium changed to 1ml of complete DMEM  
334 containing 10 µg/ml of Puromycin dihydrochloride from *Streptomyces alboniger* for 30 min. Cells were  
335 washed and lysed in protein loading buffer and run on an SDS-PAGE and were then western blotted,  
336 probing for puromycin. Puromycylated protein synthesis was quantified in the region of the gel between  
337 45 kDa and 80 kDa. Protein quantification following western blot was measured by densitometry using  
338 ImageJ analysis software.

## 339 Mini-replicon assays

340 293T or DF-1 cells were transfected with plasmids encoding PB2, PB1, PA and NP, along with a  
341 firefly luciferase vRNA-like reporter under a cell-type specific poll promoter (human for 293T, chicken

342 for DF1). The following concentration of plasmid were used for 293Ts, PB2- 80 ng, PB1- 80ng, PA- 20 ng,  
343 NP- 160 ng, pPol I Luc- 800 ng, these amounts were doubled for DF1s. After 48 hours, media was  
344 removed, and cells were lysed in 100 µl of 1x Passive Lysis Buffer (Promega). A Promega GloMax Multi  
345 Detection unit was used to measure luciferase activity following the manufacturer's instructions.

## 346 Virus replication assays

347 MDCK and CK cells were infected at a low MOI of 0.01 for 1 hour in serum-free DMEM, after  
348 which media was replaced with DMEM, 2 µg/ml tosyl phenylalanyl chloromethyl ketone (TPCK)-  
349 treated trypsin (MDCK cells) or Eagle's minimum essential medium (EMEM), 7% bovine serum  
350 albumin [BSA], and 10% tryptose phosphate broth (CKs). Time points were harvested in triplicate at  
351 4-, 8-, 12-, 24-, 48- and 72-hours post-infection. Virus titres were determined by plaque assay on  
352 MDCK cells.

353 10-day old embryonated hens' eggs (VALO breed) were inoculated with 100 pfu of diluted virus  
354 into the allantoic cavity. Eggs were incubated for 4-72 hours and culled via the schedule one method of  
355 refrigeration at 4°C for a minimum of 6 hours. 5 eggs were used per virus per time point. Harvested  
356 allantoic fluid from each egg was collected and virus titres were assessed by plaque assay on MDCK  
357 cells.

358 For the egg mortality rates experiment a 10-fold serial dilution of each virus (10000 pfu to 10  
359 pfu) was made as used to infect 5 embryonated eggs per virus per dilution. Embryos were candled twice  
360 daily throughout the study period to check for embryo viability (up to 84 hours post-infection). If eggs  
361 reached a predetermined end point at candling, they were deemed to be dead and the eggs chilled to  
362 ensure death before disposal. Markers of the end point included, a lack of movement of the embryo,  
363 disruption of blood vessels within the egg and/or signs of haemorrhage. If the embryos survived until  
364 the experimental end (84 hours post-infection) they were culled via a schedule one method and samples  
365 of allantoic fluid were collected to determine presence of virus via immunostaining for viral NP protein.  
366 Any eggs without positive detection of viral NP were removed from the study.

## 367 Virus infection, transmission and clinical outcome *in vivo*

368 In vivo studies were performed with three-week-old White Leghorn birds (VALO breed). Prior to  
369 the start of the experiments, birds were swabbed and bled to confirm they were naïve to the virus. All  
370 infection experiments were performed in self-contained BioFlex B50 Rigid Body Poultry isolators (Bell  
371 Isolation Systems) at negative pressure. 10 birds per group were directly inoculated with  $10^4$  pfu of virus  
372 via the intranasal route. Mock infected birds were inoculated with sterile PBS as an alternative. One day  
373 post-inoculation 8 naïve contact birds were introduced into each isolator to determine viral  
374 transmissibility.

375 Throughout the experiment, birds were swabbed in the buccal and cloacal cavities (on day 1-8,  
376 10 and 14 post-infection). Swabs were collected into 1ml of virus transport media (WHO standard).  
377 Swabs were soaked in media and vortexed for 10 seconds before centrifugation. Viral titres in swabs  
378 were determined via plaque assay.

379 At day 2 post-infection, 3 birds per group (directly infected, contact and mock infected) were  
380 euthanised via overdose of pentobarbital (at least 1 ml). A panel of tissues were collected and stored in  
381 RNA later at  $-80^{\circ}\text{C}$  until further processing. Birds were observed twice daily by members of animal  
382 services and whilst procedures were carried out for the presence of clinical signs of infection. On day 14  
383 post-infection, all remaining birds were culled via overdose of pentobarbital or cervical dislocation.

## 384 RNA extraction and RT-PCR from chicken tissues

385 30mg of tissue collected in RNA later was mixed with 750  $\mu\text{l}$  of Trizol. Tissues were homogenised  
386 using the Retsch MM 300 Bead Mill system (20 Hz, 4 minutes). 200  $\mu\text{l}$  of chloroform was added per tube,  
387 shaken vigorously and incubated for 5 min at room temperature. Samples were centrifuged ( $9,200 \times g$ ,  
388 30 minutes,  $4^{\circ}\text{C}$ ) and the top aqueous phase containing total RNA was added to a new microcentrifuge  
389 tube, subsequent RNA extraction was then carried out using the QIAGEN RNeasy mini kit following  
390 manufacturers' instructions.



391 100 ng of RNA extracted from tissue samples was used for qRT-PCR. All qRT-PCR was completed  
392 using the Superscript III platinum One-step qRT-PCR kit (Life Technologies) following manufacturer's  
393 instructions for reaction set up. Cycling conditions were as follows: i) 5 minutes hold step at 50°C, ii) a 2  
394 minute hold step at 95°C, and 40 cycles of iii) 3 seconds at 95 °C and iv) 30 second annealing and  
395 extension at 60 °C. Cycle threshold (CT) values were obtained using 7500 software v2.3. Mean CT values  
396 were calculated from triplicate data. Negative controls were included within each plate to determine  
397 any unspecific amplification or contamination. Within viral M segment qRT-PCR an M segment RNA  
398 standard curve was completed alongside the samples to quantify the amount of M gene RNA within the  
399 sample from the CT value. T7 RNA polymerase-derived transcripts from UDL-01 segment 7 were used for  
400 the preparation of the standard curve.

401 Within the cytokine qRT-PCRs, three housekeeping genes were included per sample (RPLPO-1,  
402 RPL13 and 28S rRNA) that had been previously determined to be stable in a broad range of tissues.  
403 Briefly, the geNorm algorithm (Vandesompele et al., 2002) was adopted to calculate the stability for  
404 each reference gene and the optimal reference gene number from raw Cq values of candidate reference  
405 genes using qbase+ real-time qPCR software version 3.0 (Biogazelle).

406

## 407 Funding information

408 This study was funded by the UK Research and Innovation (UKRI), Biotechnology and Biological  
409 Sciences Research Council (BBSRC) grants: BBS/E/I/00001981, BB/R012679/1, BB/P016472/1,  
410 BBS/E/I/00007030, BBS/E/I/00007031, BBS/E/I/00007035, BBS/E/I/00007036, BB/P013740/1, Zoonoses  
411 and Emerging Livestock systems (ZELS) (BB/L018853/1 and BB/S013792/1), the GCRF One Health Poultry  
412 Hub (BB/S011269/1), UK-China-Philippines-Thailand Swine and Poultry Research Initiative  
413 (BB/R012679/1), as well as the Medical Research Council grant: No. MR/M011747/1. The funders had  
414 no role in study design, data collection and interpretation, or the decision to submit the work for  
415 publication.

416

## 417 Acknowledgments

418 We would like to thank the animal housing staff for looking after the wellbeing of chickens used  
419 in this study and for monitoring their health throughout the experiments.

420

## 421 References

422

- 423 CHEN, W., CALVO, P. A., MALIDE, D., GIBBS, J., SCHUBERT, U., BACIK, I., BASTA, S., O'NEILL, R., SCHICKLI,  
424 J., PALESE, P., HENKLEIN, P., BENNINK, J. R. & YEWDELL, J. W. 2001. A novel influenza A virus  
425 mitochondrial protein that induces cell death. *Nat Med*, 7, 1306-12.
- 426 DESMET, E. A., BUSSEY, K. A., STONE, R. & TAKIMOTO, T. 2013. Identification of the N-terminal domain  
427 of the influenza virus PA responsible for the suppression of host protein synthesis. *J Virol*, 87,  
428 3108-18.
- 429 FIRTH, A. E., JAGGER, B. W., WISE, H. M., NELSON, C. C., PARSAWAR, K., WILLS, N. M., NAPTHINE, S.,  
430 TAUBENBERGER, J. K., DIGARD, P. & ATKINS, J. F. 2012. Ribosomal frameshifting used in  
431 influenza A virus expression occurs within the sequence UCC\_UUU\_CGU and is in the +1  
432 direction. *Open Biol*, 2, 120109.
- 433 GAO, H., SUN, H., HU, J., QI, L., WANG, J., XIONG, X., WANG, Y., HE, Q., LIN, Y., KONG, W., SENG, L. G.,  
434 PU, J., CHANG, K. C., LIU, X., LIU, J. & SUN, Y. 2015a. Twenty amino acids at the C-terminus of PA-  
435 X are associated with increased influenza A virus replication and pathogenicity. *J Gen Virol*, 96,  
436 2036-2049.
- 437 GAO, H., SUN, Y., HU, J., QI, L., WANG, J., XIONG, X., WANG, Y., HE, Q., LIN, Y., KONG, W., SENG, L. G.,  
438 SUN, H., PU, J., CHANG, K. C., LIU, X. & LIU, J. 2015b. The contribution of PA-X to the virulence of  
439 pandemic 2009 H1N1 and highly pathogenic H5N1 avian influenza viruses. *Sci Rep*, 5, 8262.
- 440 GAO, H., XU, G., SUN, Y., QI, L., WANG, J., KONG, W., SUN, H., PU, J., CHANG, K. C. & LIU, J. 2015c. PA-X is  
441 a virulence factor in avian H9N2 influenza virus. *J Gen Virol*, 96, 2587-2594.
- 442 GAUCHERAND, L., PORTER, B. K., LEVENE, R. E., PRICE, E. L., SCHMALING, S. K., RYCROFT, C. H.,  
443 KEVORKIAN, Y., MCCORMICK, C., KHAPERSKY, D. A. & GAGLIA, M. M. 2019. The Influenza A  
444 Virus Endoribonuclease PA-X Usurps Host mRNA Processing Machinery to Limit Host Gene  
445 Expression. *Cell Rep*, 27, 776-792 e7.
- 446 GONG, X. Q., SUN, Y. F., RUAN, B. Y., LIU, X. M., WANG, Q., YANG, H. M., WANG, S. Y., ZHANG, P., WANG,  
447 X. H., SHAN, T. L., TONG, W., ZHOU, Y. J., LI, G. X., ZHENG, H., TONG, G. Z. & YU, H. 2017. PA-X  
448 protein decreases replication and pathogenicity of swine influenza virus in cultured cells and  
449 mouse models. *Vet Microbiol*, 205, 66-70.
- 450 HAYASHI, T., CHAIMAYO, C., MCGUINNESS, J. & TAKIMOTO, T. 2016. Critical role of the PA-X C-terminal  
451 domain of influenza A virus in its subcellular localization and shutoff activity. *Journal of virology*,  
452 90, 7131-7141.
- 453 HENNION, R. M. & HILL, G. 2015. The preparation of chicken kidney cell cultures for virus propagation.  
454 *Methods Mol Biol*, 1282, 57-62.
- 455 HOFFMANN, E., NEUMANN, G., KAWAOKA, Y., HOBOM, G. & WEBSTER, R. G. 2000. A DNA transfection  
456 system for generation of influenza A virus from eight plasmids. *Proceedings of the National  
457 Academy of Sciences*, 97, 6108-6113.
- 458 HU, J., MO, Y., WANG, X., GU, M., HU, Z., ZHONG, L., WU, Q., HAO, X., HU, S., LIU, W., LIU, H., LIU, X. &  
459 LIU, X. 2015. PA-X decreases the pathogenicity of highly pathogenic H5N1 influenza A virus in  
460 avian species by inhibiting virus replication and host response. *J Virol*, 89, 4126-42.

- 461 HUSSAIN, S., TURNBULL, M. L., WISE, H. M., JAGGER, B. W., BEARD, P. M., KOVACIKOVA, K.,  
462 TAUBENBERGER, J. K., VERVELDE, L., ENGELHARDT, O. G. & DIGARD, P. 2019. Mutation of  
463 Influenza A Virus PA-X Decreases Pathogenicity in Chicken Embryos and Can Increase the Yield  
464 of Reassortant Candidate Vaccine Viruses. *J Virol*, 93.
- 465 IQBAL, M., YAQUB, T., REDDY, K. & MCCAULEY, J. W. 2009. Novel genotypes of H9N2 influenza A viruses  
466 isolated from poultry in Pakistan containing NS genes similar to highly pathogenic H7N3 and  
467 H5N1 viruses. *PLoS One*, 4, e5788.
- 468 JAGGER, B. W., WISE, H. M., KASH, J. C., WALTERS, K. A., WILLS, N. M., XIAO, Y. L., DUNFEE, R. L.,  
469 SCHWARTZMAN, L. M., OZINSKY, A., BELL, G. L., DALTON, R. M., LO, A., EFSTATHIOU, S., ATKINS,  
470 J. F., FIRTH, A. E., TAUBENBERGER, J. K. & DIGARD, P. 2012. An overlapping protein-coding  
471 region in influenza A virus segment 3 modulates the host response. *Science*, 337, 199-204.
- 472 JAMES, J., HOWARD, W., IQBAL, M., NAIR, V. K., BARCLAY, W. S. & SHELTON, H. 2016. Influenza A virus  
473 PB1-F2 protein prolongs viral shedding in chickens lengthening the transmission window. *J Gen  
474 Virol*, 97, 2516-2527.
- 475 KHAPERSKY, D. A., SCHMALING, S., LARKINS-FORD, J., MCCORMICK, C. & GAGLIA, M. M. 2016. Selective  
476 Degradation of Host RNA Polymerase II Transcripts by Influenza A Virus PA-X Host Shutoff  
477 Protein. *PLoS Pathog*, 12, e1005427.
- 478 LEE, J., YU, H., LI, Y., MA, J., LANG, Y., DUFF, M., HENNINGSON, J., LIU, Q., LI, Y., NAGY, A., BAWA, B., LI,  
479 Z., TONG, G., RICHT, J. A. & MA, W. 2017. Impacts of different expressions of PA-X protein on  
480 2009 pandemic H1N1 virus replication, pathogenicity and host immune responses. *Virology*,  
481 504, 25-35.
- 482 LIU, D., SHI, W., SHI, Y., WANG, D., XIAO, H., LI, W., BI, Y., WU, Y., LI, X., YAN, J., LIU, W., ZHAO, G., YANG,  
483 W., WANG, Y., MA, J., SHU, Y., LEI, F. & GAO, G. F. 2013. Origin and diversity of novel avian  
484 influenza A H7N9 viruses causing human infection: phylogenetic, structural, and coalescent  
485 analyses. *Lancet*, 381, 1926-32.
- 486 LONG, J. S., GIOTIS, E. S., MONCORGE, O., FRISE, R., MISTRY, B., JAMES, J., MORISSON, M., IQBAL, M.,  
487 VIGNAL, A., SKINNER, M. A. & BARCLAY, W. S. 2016. Species difference in ANP32A underlies  
488 influenza A virus polymerase host restriction. *Nature*, 529, 101-4.
- 489 MA, J., LI, S., LI, K., WANG, X. & LI, S. 2019. Effects of the PA-X and PB1-F2 Proteins on the Virulence of  
490 the 2009 Pandemic H1N1 Influenza A Virus in Mice. *Front Cell Infect Microbiol*, 9, 315.
- 491 MACHKOVECH, H. M., BLOOM, J. D. & SUBRAMANIAM, A. R. 2019. Comprehensive profiling of  
492 translation initiation in influenza virus infected cells. *PLoS Pathog*, 15, e1007518.
- 493 MATSUU, A., KOBAYASHI, T., PATCHIMASIRI, T., SHIINA, T., SUZUKI, S., CHAICHOUNE, K., RATANAKORN,  
494 P., HIROMOTO, Y., ABE, H., PARCHARIYANON, S. & SAITO, T. 2016. Pathogenicity of Genetically  
495 Similar, H5N1 Highly Pathogenic Avian Influenza Virus Strains in Chicken and the Differences in  
496 Sensitivity among Different Chicken Breeds. *PLoS One*, 11, e0153649.
- 497 OISHI, K., YAMAYOSHI, S. & KAWAOKA, Y. 2015. Mapping of a region of the PA-X protein of influenza A  
498 virus that is important for its shutoff activity. *Journal of virology*, 89, 8661-8665.
- 499 PEACOCK, T. H. P., JAMES, J., SEALY, J. E. & IQBAL, M. 2019. A Global Perspective on H9N2 Avian  
500 Influenza Virus. *Viruses*, 11.
- 501 PEACOCK, T. P., BENTON, D. J., JAMES, J., SADEYEN, J. R., CHANG, P., SEALY, J. E., BRYANT, J. E., MARTIN,  
502 S. R., SHELTON, H., BARCLAY, W. S. & IQBAL, M. 2017. Immune Escape Variants of H9N2  
503 Influenza Viruses Containing Deletions at the Hemagglutinin Receptor Binding Site Retain Fitness  
504 In Vivo and Display Enhanced Zoonotic Characteristics. *J Virol*, 91.
- 505 RIGBY, R. E., WISE, H. M., SMITH, N., DIGARD, P. & REHWINKEL, J. 2019. PA-X antagonises MAVS-  
506 dependent accumulation of early type I interferon messenger RNAs during influenza A virus  
507 infection. *Sci Rep*, 9, 7216.
- 508 SCHMIDT, E. K., CLAVARINO, G., CEPPI, M. & PIERRE, P. 2009. SUnSET, a nonradioactive method to  
509 monitor protein synthesis. *Nat Methods*, 6, 275-7.
- 510 SEALY, J. E., YAQUB, T., PEACOCK, T. P., CHANG, P., ERMETAL, B., CLEMENTS, A., SADEYEN, J. R.,  
511 MEHBOOB, A., SHELTON, H., BRYANT, J. E., DANIELS, R. S., MCCAULEY, J. W. & IQBAL, M. 2018.  
512 Association of Increased Receptor-Binding Avidity of Influenza A(H9N2) Viruses with Escape  
513 from Antibody-Based Immunity and Enhanced Zoonotic Potential. *Emerg Infect Dis*, 25, 63-72.

- 514 SELMAN, M., DANKAR, S. K., FORBES, N. E., JIA, J. J. & BROWN, E. G. 2012. Adaptive mutation in  
515 influenza A virus non-structural gene is linked to host switching and induces a novel protein by  
516 alternative splicing. *Emerg Microbes Infect*, 1, e42.
- 517 SIRONI, L., WILLIAMS, J. L., MORENO-MARTIN, A. M., RAMELLI, P., STELLA, A., JIANLIN, H., WEIGEND, S.,  
518 LOMBARDI, G., CORDIOLI, P. & MARIANI, P. 2008. Susceptibility of different chicken lines to  
519 H7N1 highly pathogenic avian influenza virus and the role of Mx gene polymorphism coding  
520 amino acid position 631. *Virology*, 380, 152-6.
- 521 SONG, W. & QIN, K. 2020. Human-infecting influenza A (H9N2) virus: A forgotten potential pandemic  
522 strain? *Zoonoses Public Health*, 67, 203-212.
- 523 SUN, Y., HU, Z., ZHANG, X., CHEN, M., WANG, Z., XU, G., BI, Y., TONG, Q., WANG, M., SUN, H., PU, J.,  
524 IQBAL, M. & LIU, J. 2020. R195K mutation in the PA-X protein increases the virulence and  
525 transmission of influenza A virus in mammalian hosts. *J Virol*.
- 526 TE VELTHUIS, A. J. & FODOR, E. 2016. Influenza virus RNA polymerase: insights into the mechanisms of  
527 viral RNA synthesis. *Nat Rev Microbiol*, 14, 479-93.
- 528 VASIN, A. V., TEMKINA, O. A., EGOROV, V. V., KLOTCHENKO, S. A., PLOTNIKOVA, M. A. & KISELEV, O. I.  
529 2014. Molecular mechanisms enhancing the proteome of influenza A viruses: an overview of  
530 recently discovered proteins. *Virus Res*, 185, 53-63.
- 531 WISE, H. M., FOEGLEIN, A., SUN, J., DALTON, R. M., PATEL, S., HOWARD, W., ANDERSON, E. C., BARCLAY,  
532 W. S. & DIGARD, P. 2009. A complicated message: Identification of a novel PB1-related protein  
533 translated from influenza A virus segment 2 mRNA. *Journal of virology*, 83, 8021-8031.
- 534 WISE, H. M., HUTCHINSON, E. C., JAGGER, B. W., STUART, A. D., KANG, Z. H., ROBB, N., SCHWARTZMAN,  
535 L. M., KASH, J. C., FODOR, E., FIRTH, A. E., GOG, J. R., TAUBENBERGER, J. K. & DIGARD, P. 2012.  
536 Identification of a novel splice variant form of the influenza A virus M2 ion channel with an  
537 antigenically distinct ectodomain. *PLoS pathogens*, 8, e1002998-e1002998.
- 538 YAMAYOSHI, S., WATANABE, M., GOTO, H. & KAWAOKA, Y. 2016. Identification of a novel viral protein  
539 expressed from the PB2 segment of influenza A virus. *Journal of virology*, 90, 444-456.

540

541

542

543

544

545

546

547

548

549

550

551

552

553

554

555

556

557 **Table 1. Summary of PA-X mutants made in this study**

558

559

560

561

562

563

564

565

566

567

568

569

570

571

572

573

574

575

576

577

578

579

580

581

582

583

584

585

586

587

| Mutation name | Original nt | Mutated nt     | nt position(s)      | PA-X Amino acid change |
|---------------|-------------|----------------|---------------------|------------------------|
| <b>FS</b>     | TCC TTT CGT | AGC TTC<br>AGA | 568,569,573,574,576 |                        |
| <b>PTC1</b>   | C           | A              | 621                 | I207STOP               |
| <b>PTC2</b>   | C, C, G     | A, G, A        | 634,636,642         | R212STOP,<br>L214STOP  |
| <b>PTC3</b>   | T           | A              | 678                 | L226STOP               |
| <b>PTC4</b>   | G           | A              | 699                 | V233STOP               |

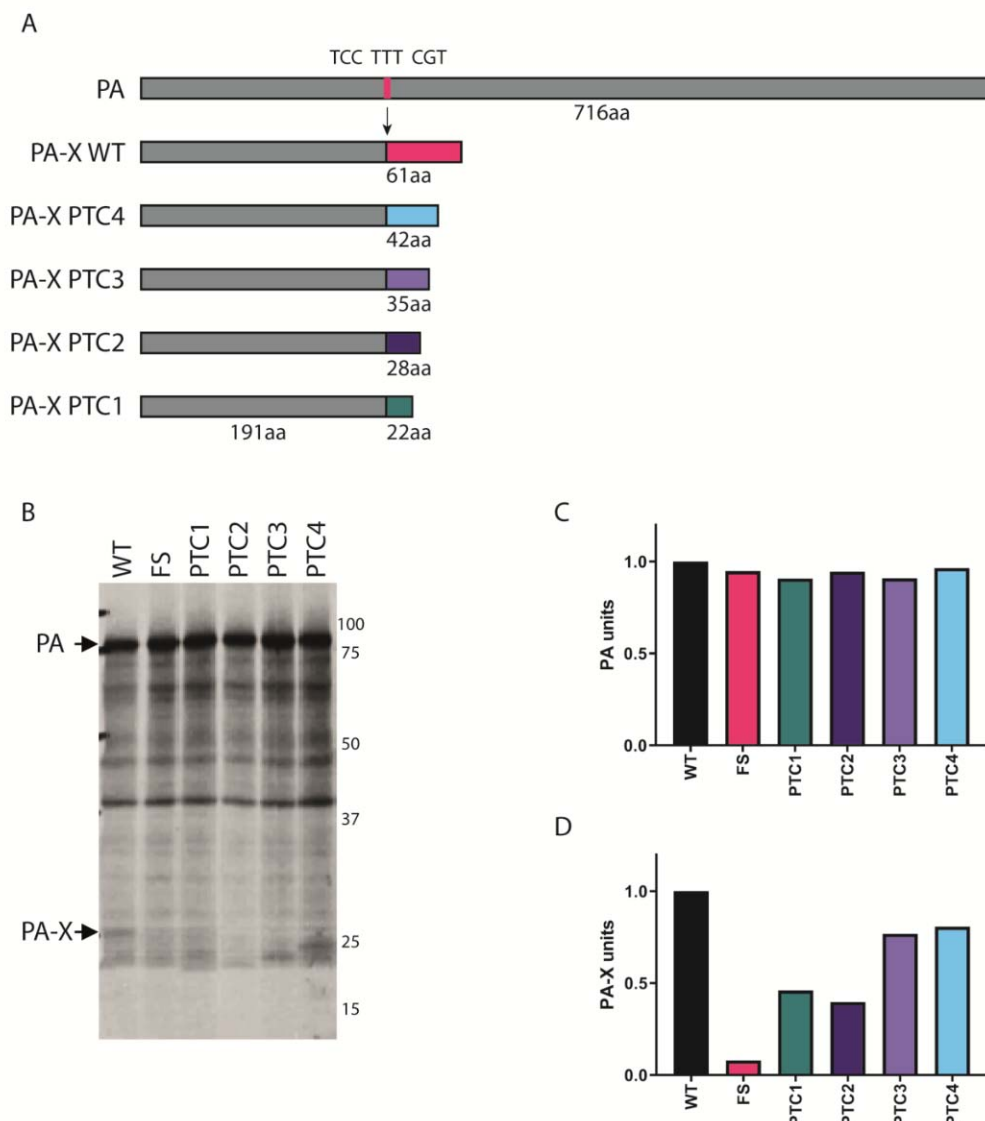

588

589

590

591

592

593

594

595

596

597

**Figure 1. Generation and validation of H9N2 viruses with mutant PA-X proteins.** A panel of mutations were made within UDL-01 segment 3 that altered PA-X expression. (A) Location of mutations within frameshift site and X-ORF. Dark grey rectangle represents PA, light grey rectangle represents X-ORF. Pink line represents location of the frameshift site (FS), coloured lines represents location of PTC mutations. (B) Coupled in vitro transcription-translation reactions radiolabelled with  $^{35}\text{S}$ -methionine were carried out using the TnT rabbit reticulocyte lysate system and protein products analysed using SDS-PAGE and autoradiography. PA and PA-X expression are marked via black arrows. (C) quantification of the AUC of the densitometry analysis of the PA band using ImageJ analysis software. (D) quantification of the AUC of the densitometry analysis of the PA-X band using ImageJ analysis software.

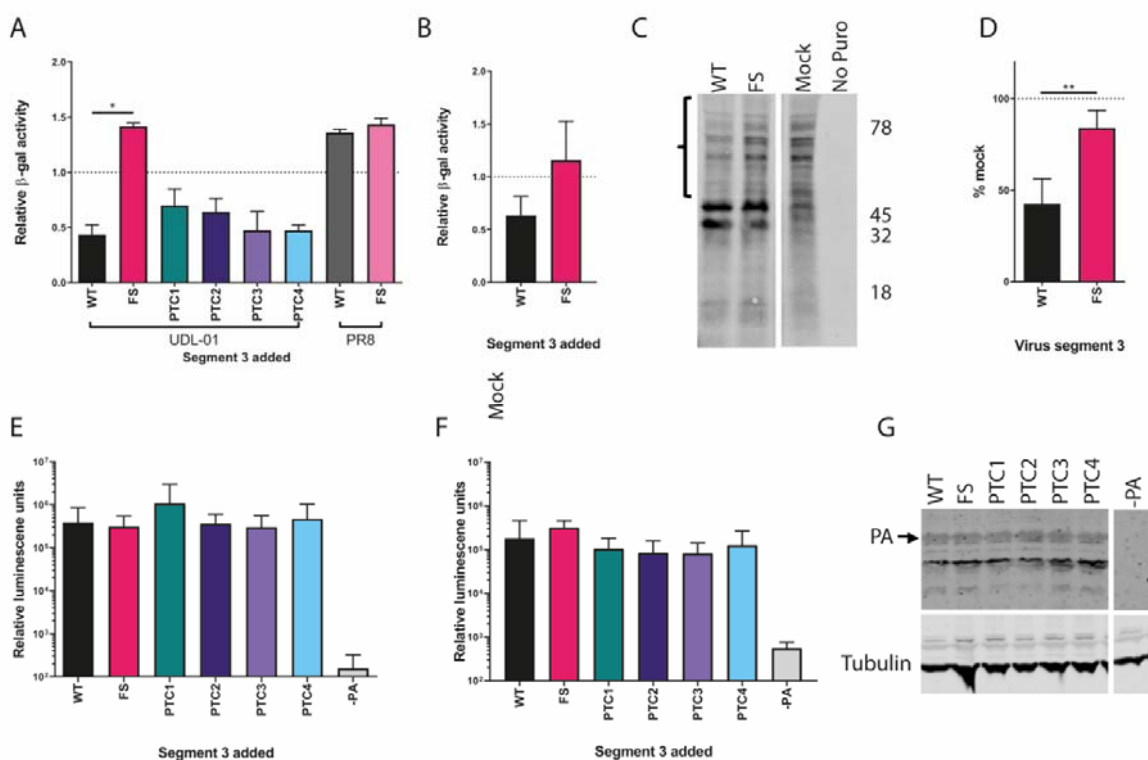

598

599 **Figure 2. Ablation of PA-X expression leads to a loss of host cell shutoff but has no effect on virus**  
600 **polymerase activity.** (A) 293T cells or (B) DF-1 cells were transfected with a  $\beta$ -gal reporter plasmid  
601 alongside the indicated segment 3 expression plasmids with or without PA-X mutations. 48 hours post-  
602 transfection cells were lysed and levels of  $\beta$ -gal enzymatic activity assessed by colorimetric assay.  
603 Results were normalised to an empty vector control. Graphs represent the average  $\pm$  SD of 3  
604 independent experiments. Statistical significance was determined by one-way ANOVA with multiple  
605 comparisons (A) or unpaired T-test (B). (C, D) MDCK cells were infected with a high MOI (5) using viruses  
606 expressing PA-X (WT) or with PA-X expression removed (FS). Seven hours post-infection cells were  
607 pulsed with puromycin for 30 minutes and then lysed and samples run on SDS-PAGE gels. Membranes  
608 were probed for presence of puromycin. (C) Representative SDS-PAGE gel with the area quantified  
609 highlighted in brackets. The approximate position of molecular mass markers (kDa) is also indicated. (D)  
610 Quantification of the densitometry of the highlighted area (above 47 kDa) performed using ImageJ  
611 analysis software. Graph represents the average of 3 independent experiments  $\pm$  SD. Each data group  
612 is normalised to mock levels of protein synthesis. Statistics determined by unpaired T-test. (E) 293T cells  
613 or (F) DF-1 cells were transfected with the components of the polymerase complex (PB1, PB2, PA and  
614 NP) plus a vRNA mimic encoding luciferase. 48 hours post-transfection cells were lysed and luciferase  
615 levels measured. Data are the average of 3 independent experiments  $\pm$  SD. Statistics were determined  
616 by Kruskal Wallis test with multiple comparisons. (G) PA and tubulin expression levels were determined

617 via western blot analysis of 293T cell lysates from part (E). P values for statistics throughout: \*, 0.05 ≥ P  
 618 > 0.01; \*\*, 0.01 ≥ P > 0.001

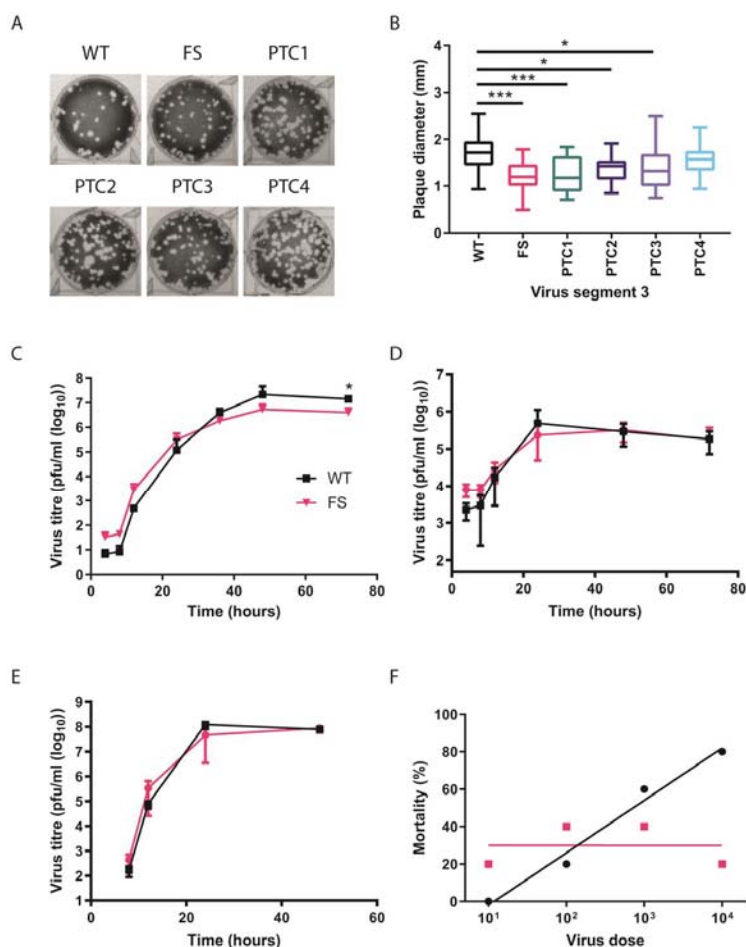

619  
 620 **Figure 3. PA-X deficient viruses have a minor growth defect and lower *in ovo* mortality.** (A,B) Viruses  
 621 were rescued using reverse genetics and titrated under a 0.6% agarose overlay in order to ascertain the  
 622 plaque phenotype. (A) After 72 hours cells were fixed and stained with 0.1% crystal violet solution and  
 623 plates imaged. (B) ImageJ analysis software was used to measure the diameter of 20 plaques per virus.  
 624 Graph represents average diameter of 20 plaques +/- SD. Statistical significance was determined by one-  
 625 way ANOVA with multiple comparisons. (C) MDCK cells or (D) CK cells were infected with a low MOI  
 626 (0.01) of WT or FS H9N2 viruses. Cell supernatants were harvested at 4, 8, 12, 24, 36, 48 and 72 hours  
 627 post-infection and titrated via plaque assay. Graphs represent an average of 3 independent experiments  
 628 +/- SD. (E) 10-day old fertilised hens' eggs were infected with 100 pfu of each virus. Allantoic fluid was  
 629 collected at 4, 8, 12, 24 and 48 hours post-infection and titrated via plaque assay. Graph represents an  
 630 average of 5 eggs per virus per time point +/- SD. Statistics through determined by Mann-Whitney U  
 631 test. (F) Embryonated hens' eggs were infected with different doses of virus, at 84 hours post-infection,  
 632 total embryo mortality after infection with the indicated viruses at each viral dose was calculated. Line



633 represents non-linear fit of data with each data point represent % mortality at the viral dilution. P  
 634 values for statistics throughout: \*,  $0.05 \geq P > 0.01$ ; \*\*,  $0.001 \geq P > 0.0001$ .

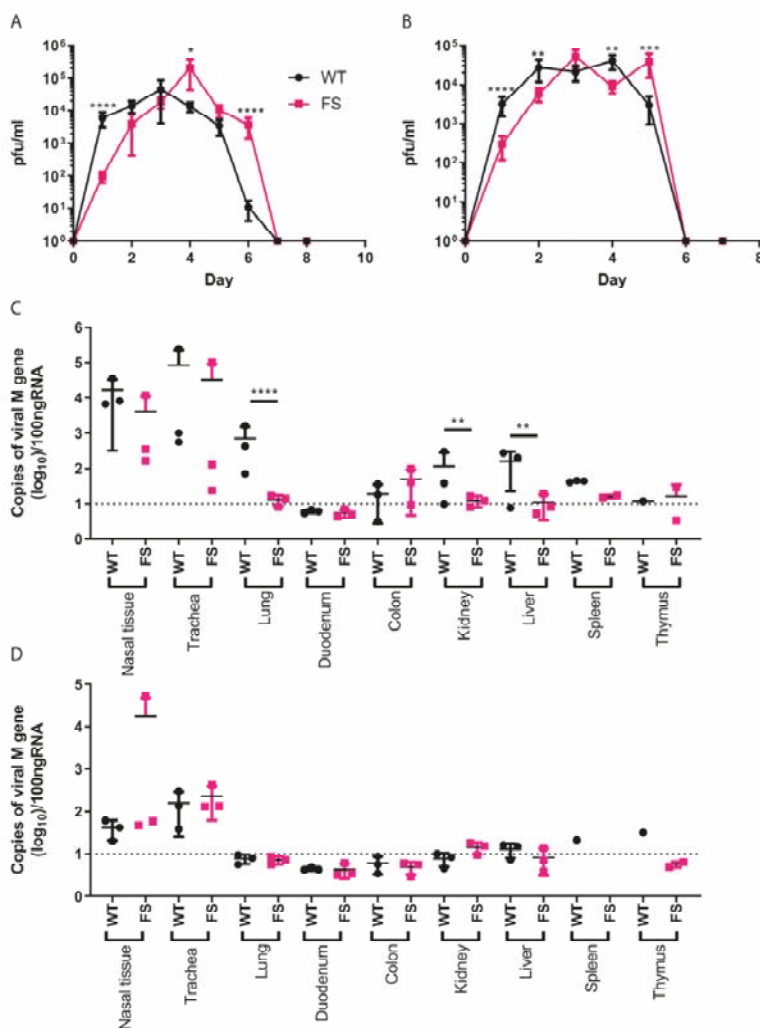

635  
 636 **Figure 4. A lack of PA-X results in delayed shedding *in vivo* and restricted organ tropism.** Birds were  
 637 directly infected with either WT or FS H9N2 virus and naive contact birds were introduced one day post-  
 638 inoculation. Swabs were taken from the buccal cavity throughout the study duration and virus titrated  
 639 via plaque assay. The average +/- SD buccal shedding profile of at least 4 birds per group are shown for  
 640 (A) directly infected birds and (B) contact birds. Statistics determined by Mann-Whitney U Test. (C, D)  
 641 Detection of viral M gene within tissues of (C) directly infected and (D) contact birds. On day 2 post-  
 642 infection 3 birds per group were culled, a panel of tissues taken and following RNA extraction qRT-PCR  
 643 for viral M gene carried out. Dotted lines indicate limit of detection. CT values were compared to a M  
 644 gene standard curve to determine copy number. Graphs show mean RNA copy number +/- SD. Statistics  
 645 determined by unpaired T-test throughout. P values for statistics throughout: \*,  $0.05 \geq P > 0.01$ ; \*\*,  $0.01$   
 646  $\geq P > 0.001$ ; \*\*\*,  $0.001 \geq P > 0.0001$ ; \*\*\*\*,  $P \leq 0.0001$ .

647  
 648

649

650

651

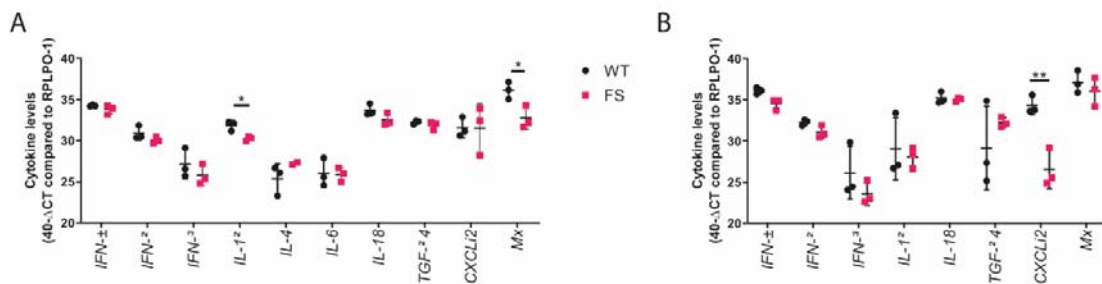

652

653 **Figure 5. Cytokine induction in H9N2 infected birds.** RNA was extracted from nasal tissue (A) or trachea  
654 (B) of WT and FS infected chickens. qRT-PCR was performed for a panel of cytokines and levels  
655 compared to the reference gene, RPLPO-1 were calculated. Cytokine expression for each bird is  
656 represented in a single point, with error bars displaying mean +/- SD of tissues from n=3 chickens.  
657 Statistics were determined by Unpaired T-tests. P values for statistics throughout: \*, 0.05 ≥ P > 0.01; \*\*,  
658 0.01 ≥ P > 0.001
